# Supplementary material for: Survival of pediatric patients after cardiopulmonary resuscitation for in-hospital cardiac arrest: a systematic review and meta-analysis
Source: Springer Nature journal article supplement (doi:10.1186/s13052-021-01058-9), 2021-05-29
Supplement: MOESM2 [file 19209564]

Table S1: The Newcastle-Ottawa Scale based quality assessment of included studies, 2020

| S. No.                                                                                                                                                                                                                                                                                                                                                                                                                                                                                                                                                                     | Authors' name              | Publication year | Study area | Study design | Domain    |               |         | Total | Quality |
|----------------------------------------------------------------------------------------------------------------------------------------------------------------------------------------------------------------------------------------------------------------------------------------------------------------------------------------------------------------------------------------------------------------------------------------------------------------------------------------------------------------------------------------------------------------------------|----------------------------|------------------|------------|--------------|-----------|---------------|---------|-------|---------|
|                                                                                                                                                                                                                                                                                                                                                                                                                                                                                                                                                                            |                            |                  |            |              | Selection | Comparability | Outcome |       |         |
| 1                                                                                                                                                                                                                                                                                                                                                                                                                                                                                                                                                                          | Appiah J et al. (24)       | 2018             | Africa     | Cohort       | 2/4       | 1/2           | 2/3     | 6/9   | Fair    |
| 2                                                                                                                                                                                                                                                                                                                                                                                                                                                                                                                                                                          | Shikuku DN et al. (25)     | 2018             | Africa     | Cohort       | 3/4       | 1/2           | 2/3     | 7/9   | Good    |
| 3                                                                                                                                                                                                                                                                                                                                                                                                                                                                                                                                                                          | Alten et al. (26)          | 2017             | America    | Cohort       | 3/4       | 1/2           | 2/3     | 8/9   | Good    |
| 4                                                                                                                                                                                                                                                                                                                                                                                                                                                                                                                                                                          | Anton-Martin P et al. (27) | 2020             | America    | Cohort       | 3/4       | 1/2           | 2/3     | 7/9   | Good    |
| 5                                                                                                                                                                                                                                                                                                                                                                                                                                                                                                                                                                          | Barbaro RP et al. (28)     | 2017             | America    | Cohort       | 3/4       | 1/2           | 2/3     | 7/9   | Good    |
| 6                                                                                                                                                                                                                                                                                                                                                                                                                                                                                                                                                                          | Berg et al. (29)           | 2016             | America    | Cohort       | 3/4       | 1/2           | 2/3     | 7/9   | Good    |
| 7                                                                                                                                                                                                                                                                                                                                                                                                                                                                                                                                                                          | Berg et al. (30)           | 2018             | America    | Cohort       | 3/4       | 1/2           | 2/3     | 8/9   | Good    |
| 8                                                                                                                                                                                                                                                                                                                                                                                                                                                                                                                                                                          | Beshish AG et al. (31)     | 2018             | America    | Cohort       | 3/4       | 1/2           | 2/3     | 7/9   | Good    |
| 9                                                                                                                                                                                                                                                                                                                                                                                                                                                                                                                                                                          | Brown S et al. (32)        | 2018             | America    | Cohort       | 3/4       | 1/2           | 2/3     | 7/9   | Good    |
| 10                                                                                                                                                                                                                                                                                                                                                                                                                                                                                                                                                                         | Burke CR et al. (33)       | 2017             | America    | Cohort       | 3/4       | 1/2           | 2/3     | 6/9   | Fair    |
| 11                                                                                                                                                                                                                                                                                                                                                                                                                                                                                                                                                                         | Foglia et al. (34)         | 2017             | America    | Cohort       | 3/4       | 1/2           | 2/3     | 7/9   | Good    |
| 12                                                                                                                                                                                                                                                                                                                                                                                                                                                                                                                                                                         | Geisser D et al. (35)      | 2019             | America    | Cohort       | 3/4       | 1/2           | 2/3     | 7/9   | Good    |
| 13                                                                                                                                                                                                                                                                                                                                                                                                                                                                                                                                                                         | Holmberg et al. (36)       | 2019             | America    | Cohort       | 3/4       | 1/2           | 2/3     | 8/9   | Good    |
| 14                                                                                                                                                                                                                                                                                                                                                                                                                                                                                                                                                                         | Homik et al. (37)          | 2016             | America    | Cohort       | 3/4       | 1/2           | 2/3     | 7/9   | Good    |
| 15                                                                                                                                                                                                                                                                                                                                                                                                                                                                                                                                                                         | Shakoor A et al. (38)      | 2019             | America    | Cohort       | 3/4       | 1/2           | 2/3     | 6/9   | Fair    |
| 16                                                                                                                                                                                                                                                                                                                                                                                                                                                                                                                                                                         | Torres-Andres et al. (39)  | 2018             | America    | Cohort       | 3/4       | 1/2           | 2/3     | 7/9   | Good    |
| 17                                                                                                                                                                                                                                                                                                                                                                                                                                                                                                                                                                         | Assar S et al. (40)        | 2016             | Asia       | Cohort       | 3/4       | 1/2           | 2/3     | 8/9   | Good    |
| 18                                                                                                                                                                                                                                                                                                                                                                                                                                                                                                                                                                         | Chen GL et al. (41)        | 2018             | Asia       | Cohort       | 3/4       | 1/2           | 2/3     | 7/9   | Good    |
| 19                                                                                                                                                                                                                                                                                                                                                                                                                                                                                                                                                                         | Erek et al. (42)           | 2017             | Asia       | Cohort       | 3/4       | 1/2           | 2/3     | 6/9   | Fair    |
| 20                                                                                                                                                                                                                                                                                                                                                                                                                                                                                                                                                                         | Kabbani et al. (16)        | 2019             | Asia       | Cohort       | 3/4       | 1/2           | 2/3     | 7/9   | Good    |
| 21                                                                                                                                                                                                                                                                                                                                                                                                                                                                                                                                                                         | Mok YH et al. (43)         | 2016             | Asia       | Cohort       | 3/4       | 1/2           | 2/3     | 6/9   | Fair    |
| 22                                                                                                                                                                                                                                                                                                                                                                                                                                                                                                                                                                         | Rathore V et al. (44)      | 2016             | Asia       | Cohort       | 3/4       | 1/2           | 2/3     | 8/9   | Good    |
| 23                                                                                                                                                                                                                                                                                                                                                                                                                                                                                                                                                                         | Adamski J et al. (45)      | 2016             | Europe     | Cohort       | 3/4       | 1/2           | 2/3     | 8/9   | Good    |
| 24                                                                                                                                                                                                                                                                                                                                                                                                                                                                                                                                                                         | Kramer P et al. (46)       | 2020             | Europe     | Cohort       | 3/4       | 1/2           | 2/3     | 7/9   | Good    |
| 25                                                                                                                                                                                                                                                                                                                                                                                                                                                                                                                                                                         | Skellett S et al. (47)     | 2020             | Europe     | Cohort       | 3/4       | 1/2           | 2/3     | 7/9   | Good    |
| <p><i>Thresholds for converting the Newcastle-Ottawa scales score to the Agency for Healthcare Research and Quality (AHRQ) standards (as good, fair, and poor): - Good quality: 3 or 4 stars in selection domain AND 1 or 2 stars in comparability domain AND 2 or 3 stars in outcome/exposure domain; Fair quality: 2 stars in selection domain AND 1 or 2 stars in comparability domain AND 2 or 3 stars in outcome/exposure domain; Poor quality: 0 or 1 star in selection domain OR 0 stars in comparability domain OR 0 or 1 stars in outcome/exposure domain</i></p> |                            |                  |            |              |           |               |         |       |         |
