# Supplementary material for: Survival of pediatric patients after cardiopulmonary resuscitation for in-hospital cardiac arrest: a systematic review and meta-analysis
Source: Springer Nature journal article supplement (doi:10.1186/s13052-021-01058-9), 2021-05-29
Supplement: MOESM3 [file 19209564]

*Table S2: A leave-one-out sensitivity analysis among included studies showing if the pooled magnitude of survival to hospital discharge was greatly impacted by the result of a single study, 2020*

| Study omitted                                 | Estimate | 95% CI     |
|-----------------------------------------------|----------|------------|
| Appiah J et al. (24)                          | 0.45     | 0.41, 0.49 |
| Shikuku DN et al. (25)                        | 0.46     | 0.42, 0.50 |
| Alten et al. (26)                             | 0.46     | 0.41, 0.50 |
| Anton-Martin P et al. (27)                    | 0.46     | 0.42, 0.50 |
| Barbaro RP et al. (28)                        | 0.47     | 0.41, 0.52 |
| Berg et al. (29)                              | 0.46     | 0.42, 0.50 |
| Berg et al. (30)                              | 0.46     | 0.42, 0.50 |
| Beshish AG et al. (31)                        | 0.46     | 0.42, 0.50 |
| Brown S et al. (32)                           | 0.46     | 0.42, 0.50 |
| Burke CR et al. (33)                          | 0.46     | 0.42, 0.50 |
| Foglia et al. (34)                            | 0.45     | 0.41, 0.49 |
| Geisser D et al. (35)                         | 0.46     | 0.42, 0.50 |
| Holmberg et al. (36)                          | 0.46     | 0.41, 0.52 |
| Hornik et al. (37)                            | 0.46     | 0.41, 0.50 |
| Shakoor A et al. (38)                         | 0.46     | 0.42, 0.50 |
| Torres-Andres et al. (39)                     | 0.45     | 0.41, 0.49 |
| Assar S et al. (40)                           | 0.48     | 0.44, 0.51 |
| Chen GL et al. (41)                           | 0.46     | 0.42, 0.50 |
| Erek et al. (42)                              | 0.47     | 0.43, 0.51 |
| Kabbani et al. (16)                           | 0.45     | 0.41, 0.49 |
| Mok YH et al. (43)                            | 0.46     | 0.42, 0.50 |
| Rathore V et al. (44)                         | 0.47     | 0.44, 0.51 |
| Adamski J et al. (45)                         | 0.46     | 0.41, 0.50 |
| Kramer P et al. (46)                          | 0.46     | 0.42, 0.51 |
| Skellett S et al. (47)                        | 0.46     | 0.41, 0.50 |
| Overall                                       | 0.46     | 0.43, 0.50 |
| <i>Abbreviations: CI; Confidence Interval</i> |          |            |
